# Supplementary material
Source: MDPI journal article supplement (https://www.mdpi.com/1424-2818/15/7/833)

Supplementary File S2

Table S1: Cleaned data.

| Biome         | Forest  | Coastal | Savanna | Coastal + Savanna combined | Total   |
|---------------|---------|---------|---------|----------------------------|---------|
| N species     | 1,883   | 325     | 995     | 1,320                      | 3,203   |
| N occurrences | 158,688 | 12,172  | 130,299 | 142,471                    | 301,159 |

Table S2: Results from the diversity analyses showing median values of grid cells rarefied to 30 occurrences.

|                     | Forest zone |              |          | Transition zone |              |          | Savanna zone |              |          |
|---------------------|-------------|--------------|----------|-----------------|--------------|----------|--------------|--------------|----------|
|                     | Forest spp. | Savanna spp. | Combined | Forest spp.     | Savanna spp. | Combined | Forest spp.  | Savanna spp. | Combined |
| SR                  | 26.86       | 18.93        | 27.08    | 22.59           | 22.26        | 24.84    | 15.64        | 23.42        | 23.64    |
| PD                  | 1921        | 1459.8       | 2207     | 1788.9          | 1732         | 2128     | 1240.1       | 1639         | 1915.8   |
| PD <sub>ses</sub>   | -0.45       | -0.49        | -0.93    | 0.16            | -0.01        | -0.5     | -0.02        | -0.61        | -1.1     |
| MPD                 | 227.8       | 224          | 227.2    | 229.7           | 228.2        | 229.7    | 225.9        | 223.7        | 224.2    |
| MPD <sub>ses</sub>  | -0.23       | -0.40        | -0.57    | 0.07            | 0.18         | -0.33    | -0.36        | -0.49        | -0.75    |
| MNTD                | 107.4       | 117.8        | 108.5    | 125.1           | 122.7        | 117      | 143          | 111.7        | 110.9    |
| MNTD <sub>ses</sub> | -0.47       | -0.52        | -0.96    | 0.09            | -0.05        | -0.65    | 0.24         | -0.66        | -1.16    |

Figure S1: Violin plots of rarefied standardized effect size of mean pairwise distance ( $MPD_{ses}$ ) for forest species (A), savanna species (B) and rarefied standardized effect size of mean nearest taxon distance ( $MNTD_{ses}$ ) for forest species (C), savanna species (D) across core forest, transition and core savanna zones. Significant pairwise comparison of medians using Dunn test with Holm correction are plotted as bars with p.values.

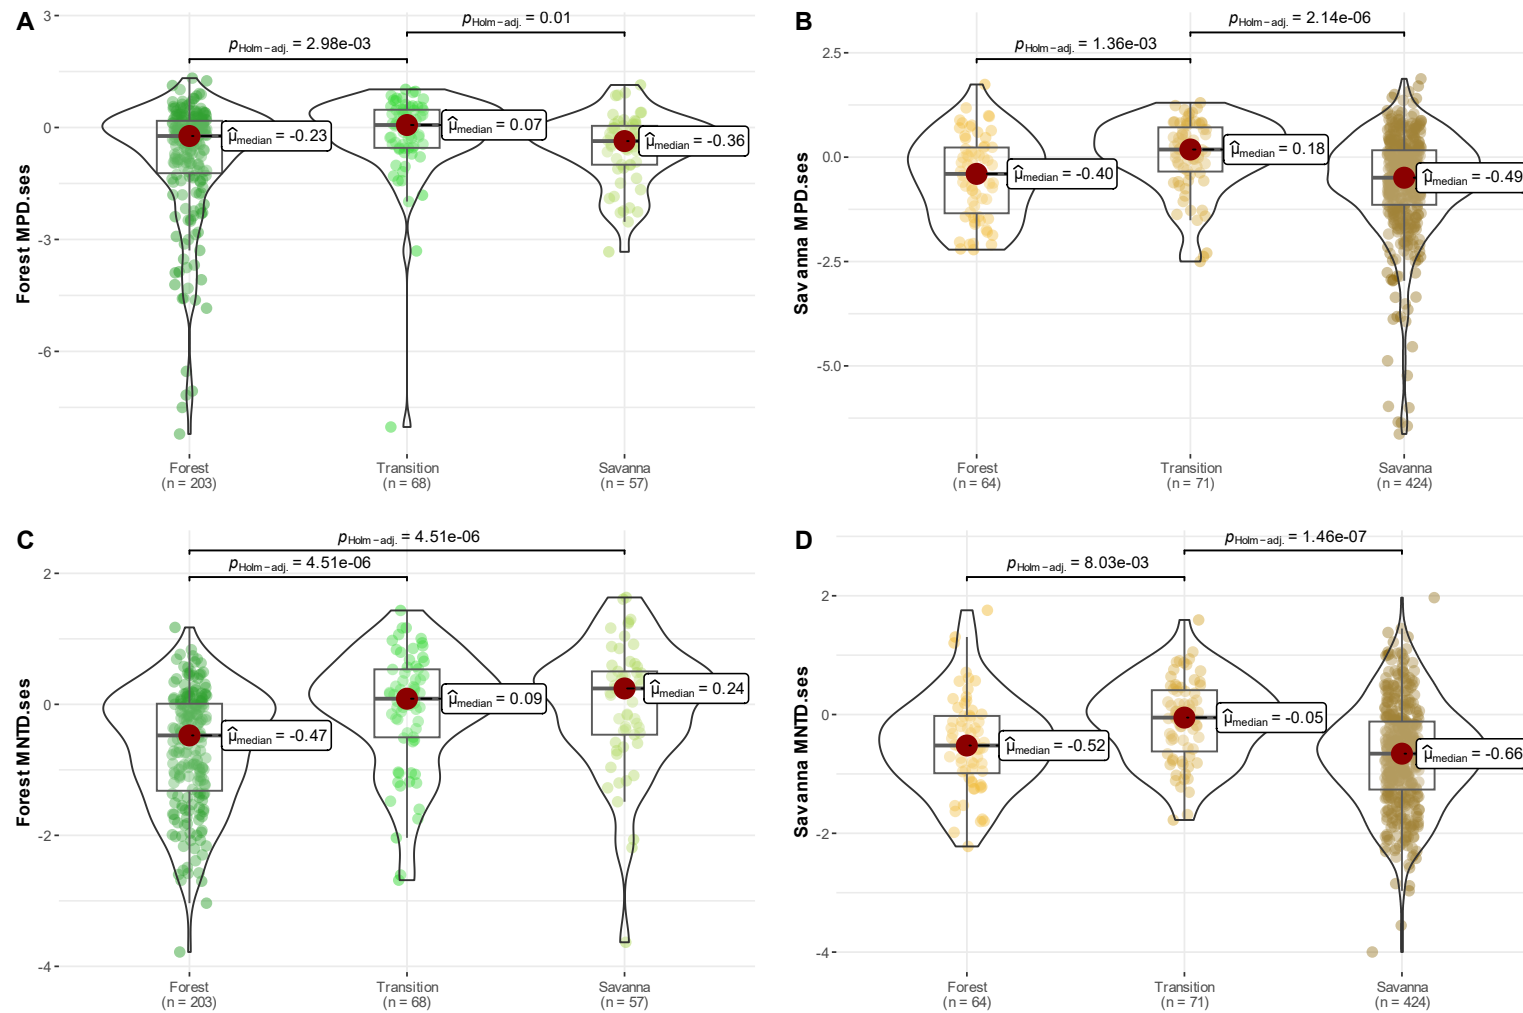

Figure S2: Map of non-rarefied woody species richness in Africa based on the 3,203 species included in this study.

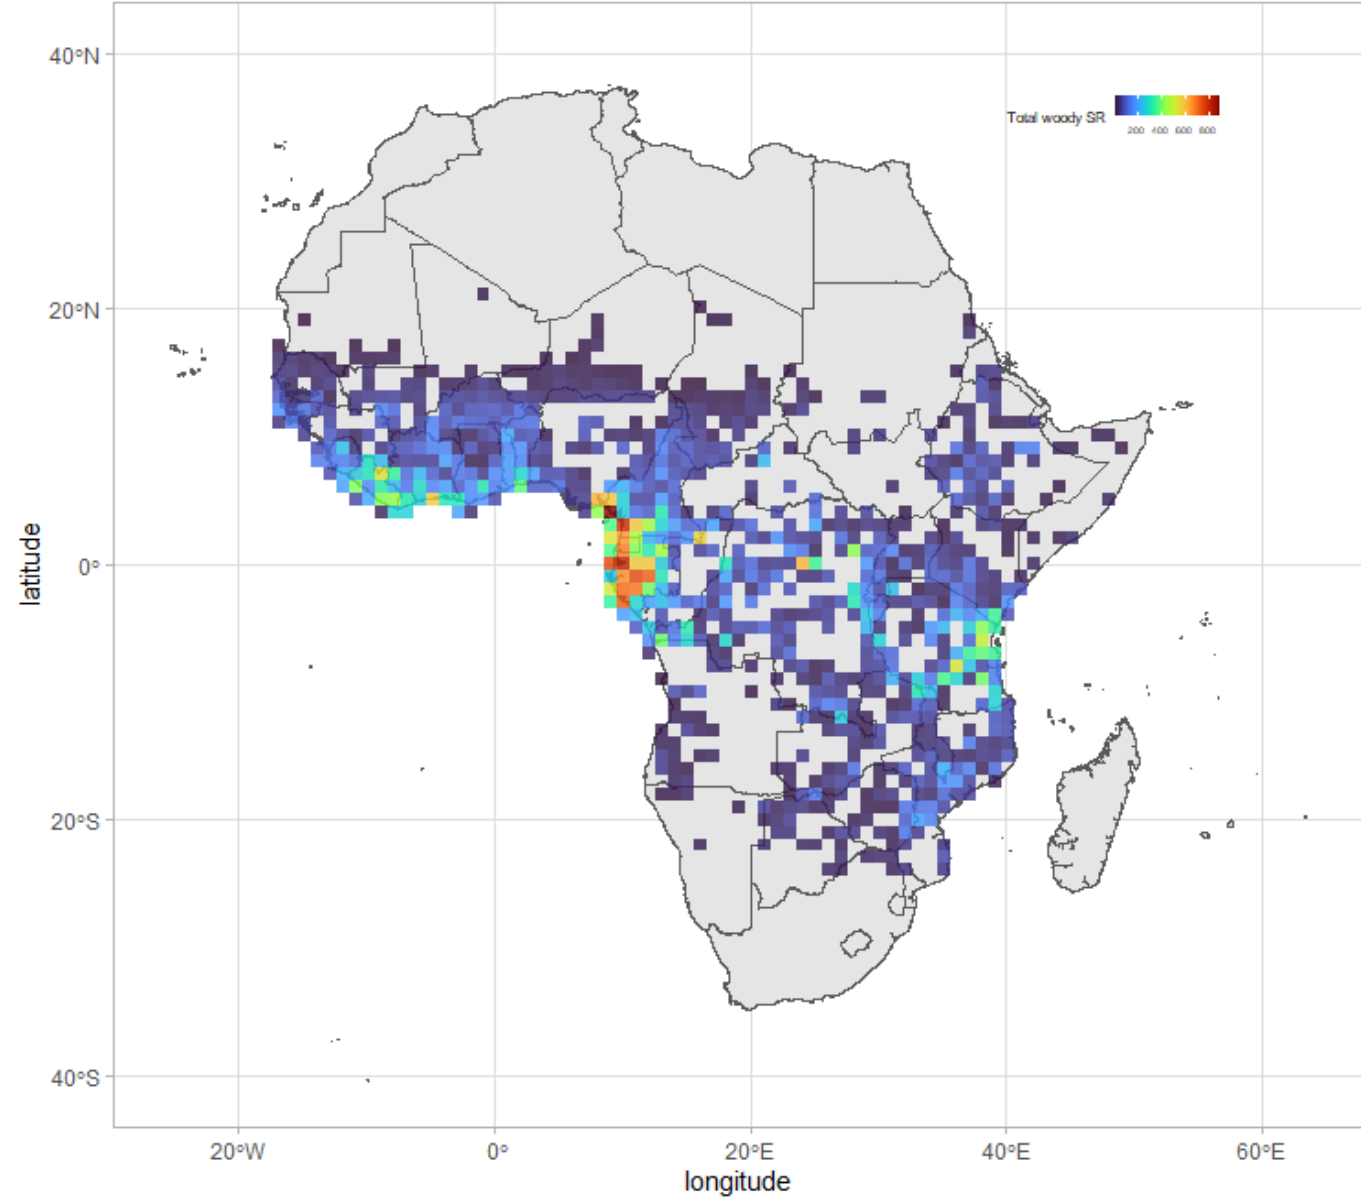

Figure S3: Map of non-rarefied forest woody species richness in Africa

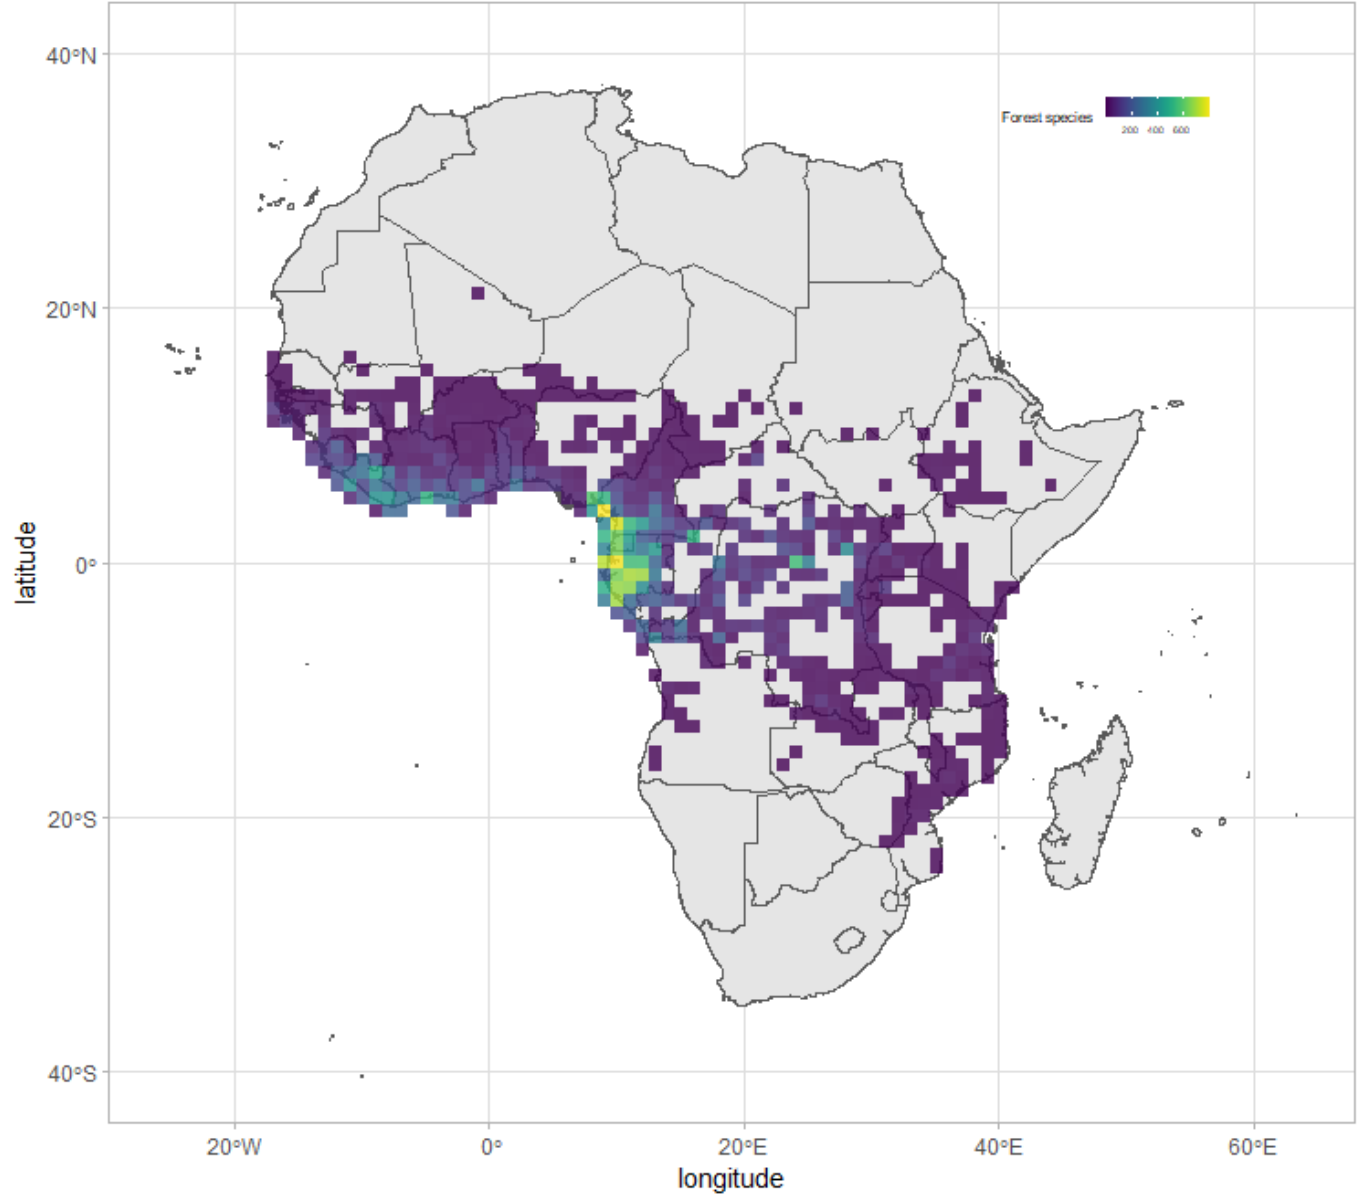

Figure S4: Map of non-rarefied savanna woody species richness in Africa

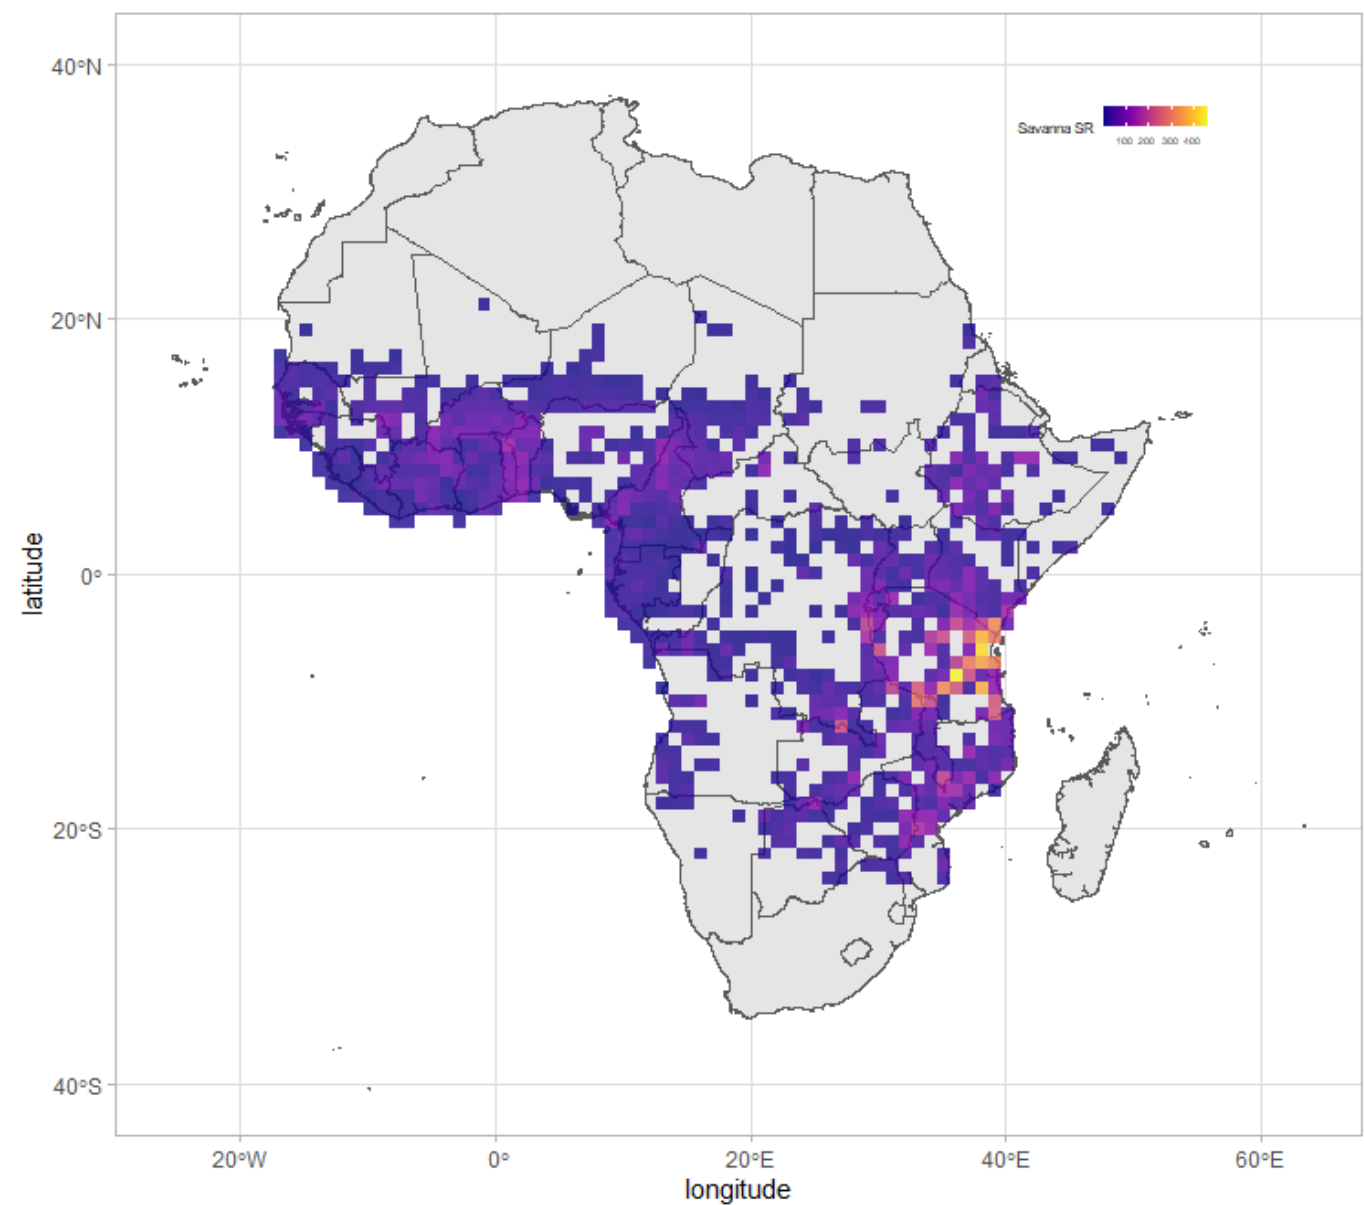

Figure S5: Map of Africa showing the classification of core forest (green) vs. transition (blue) vs. core savanna zones (brown)

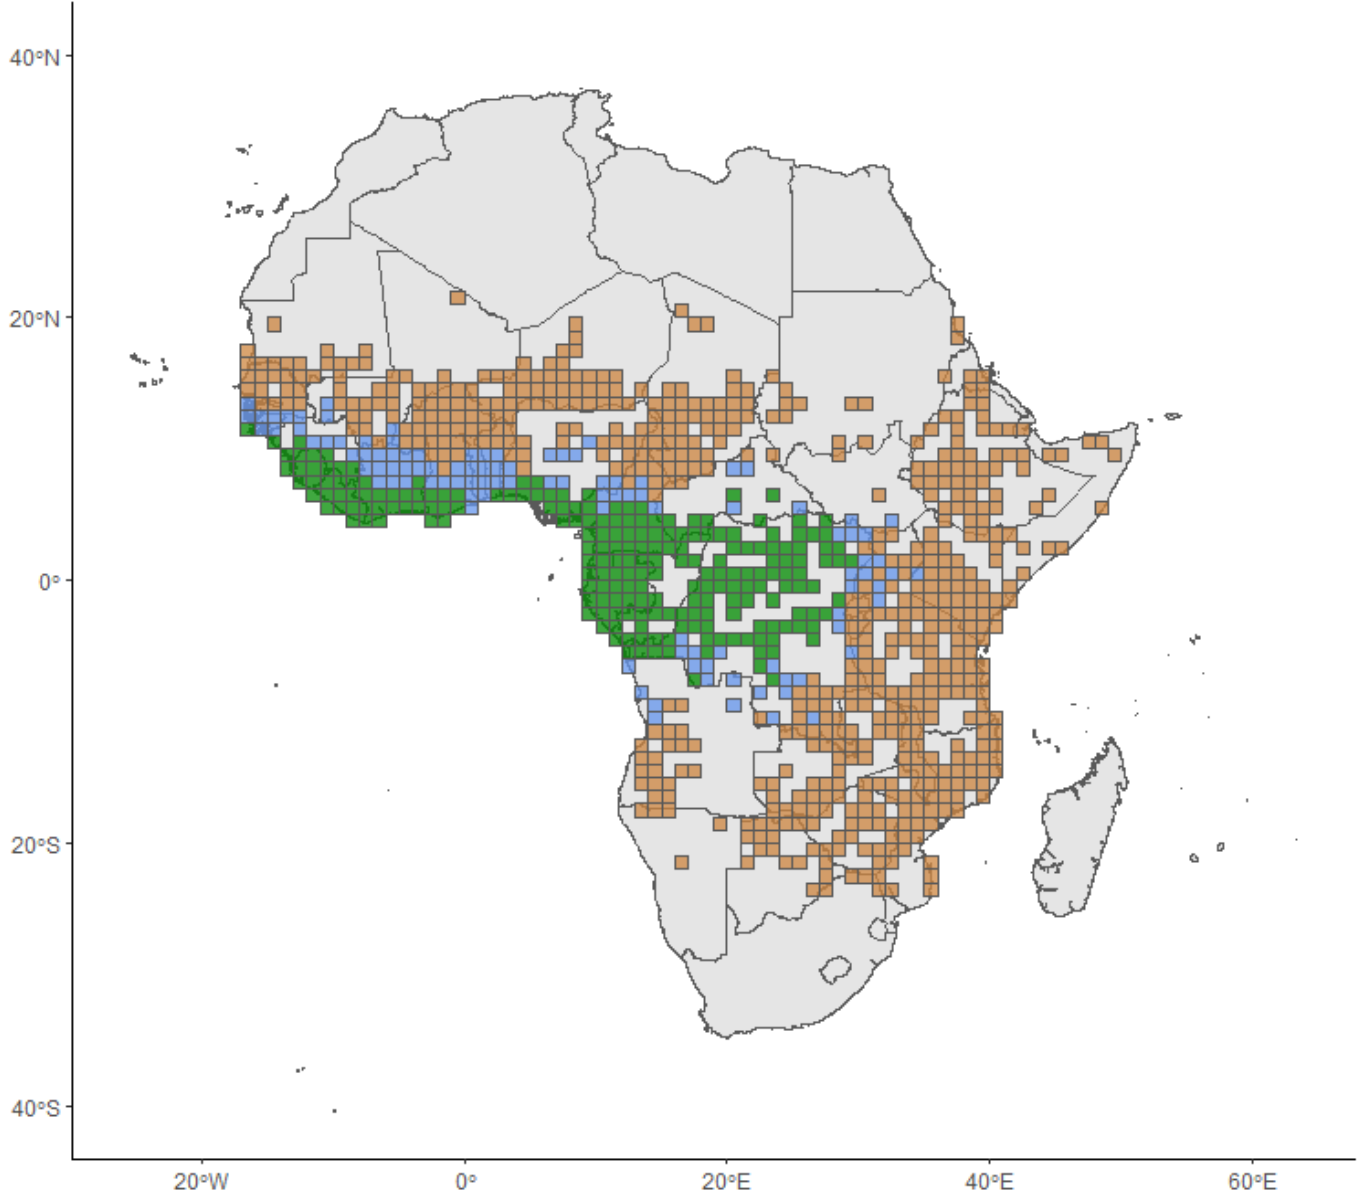

Figure S6: Map showing White's transition zones (in red) vs transition zones in this paper (in blue) (adapted from White, 1983)

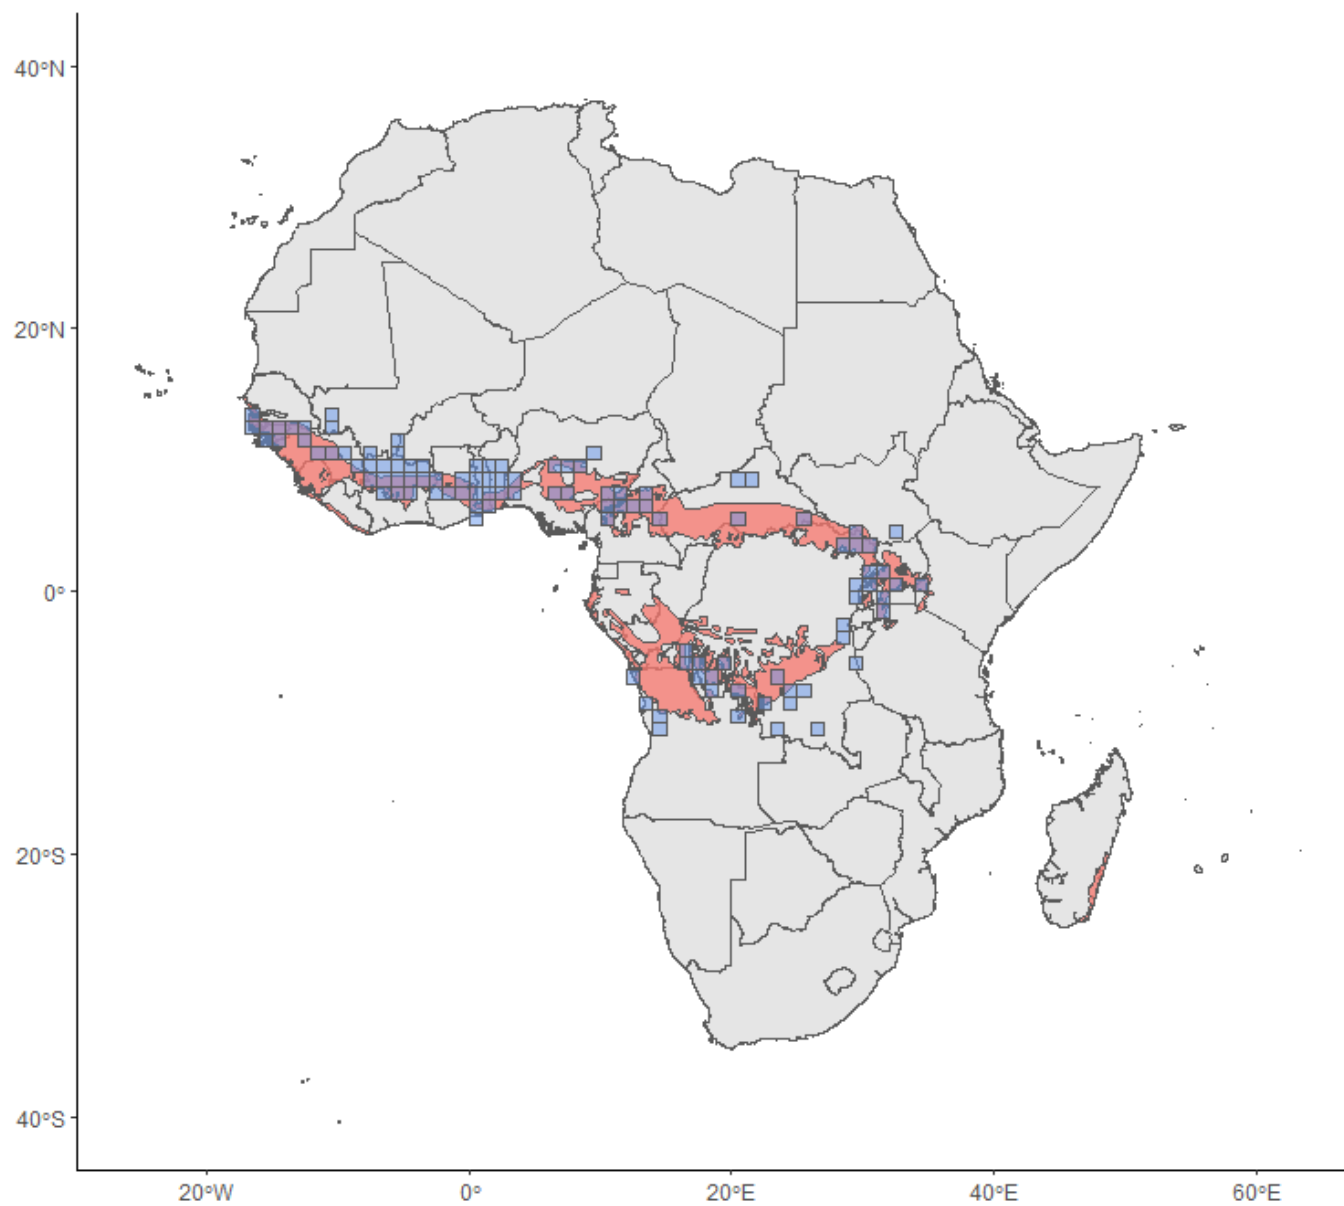



Figure S7: Map showing forest-savanna mosaics from Ecoregions vs transition zones in this paper (adapted from Dinnerstein et al. 2017).

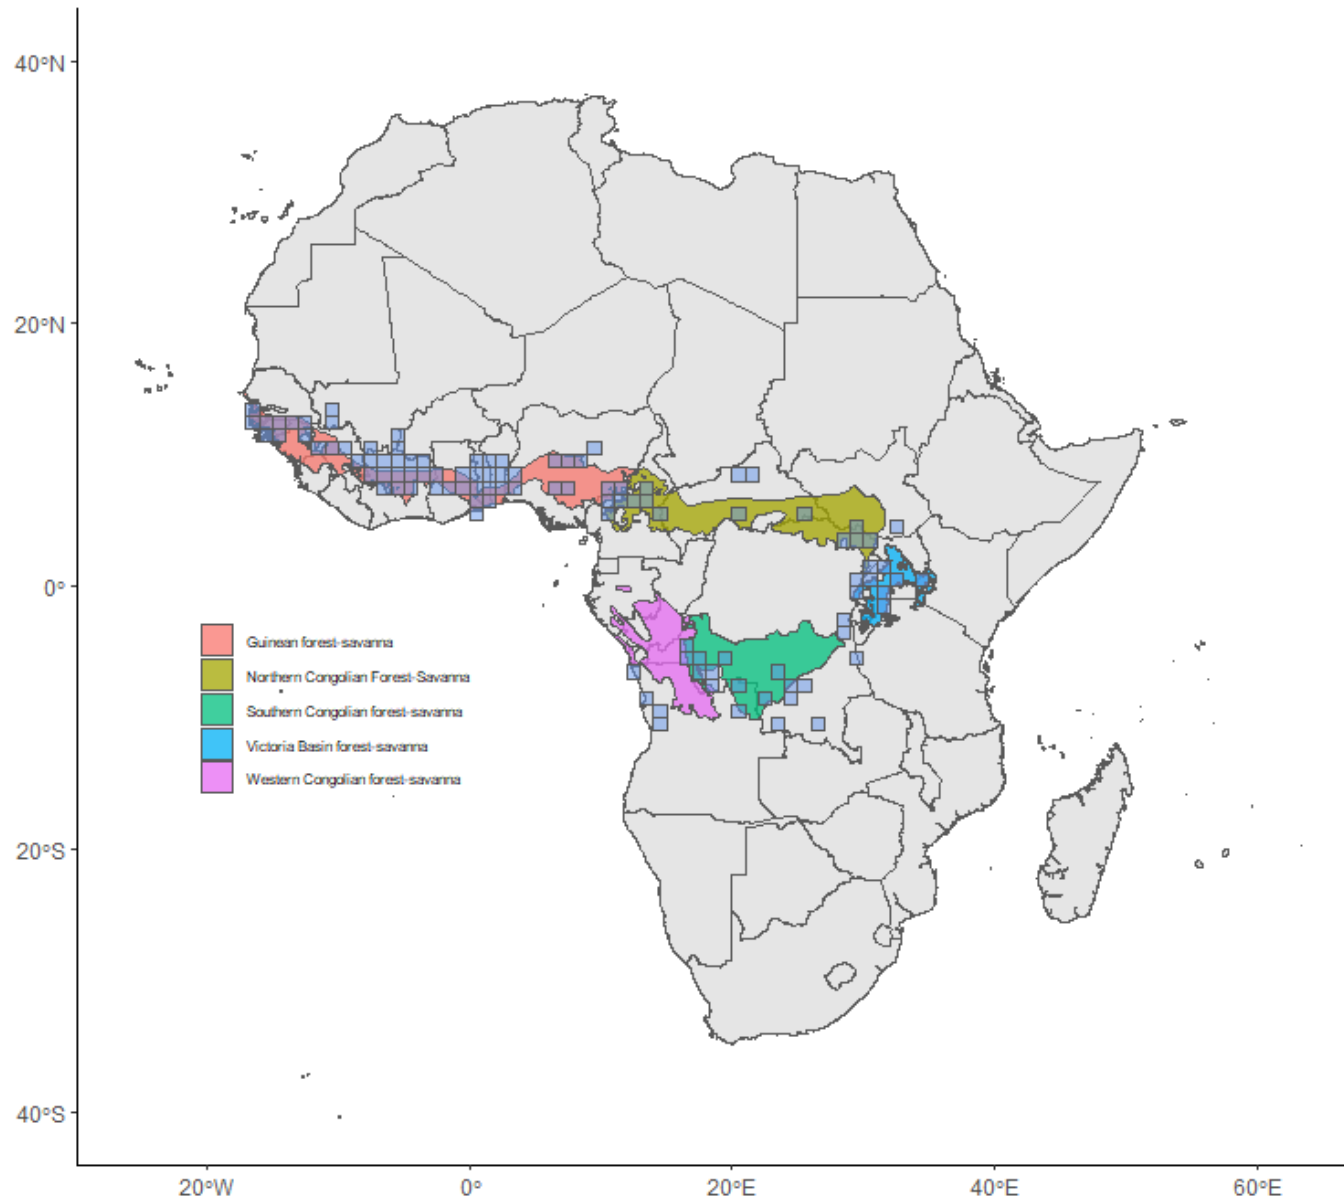

Figure S8: Map of highest 10% SR (A), highest 10%  $PD_{ses}$  (B) and lowest 10%  $PD_{ses}$  (C) for forest assemblages

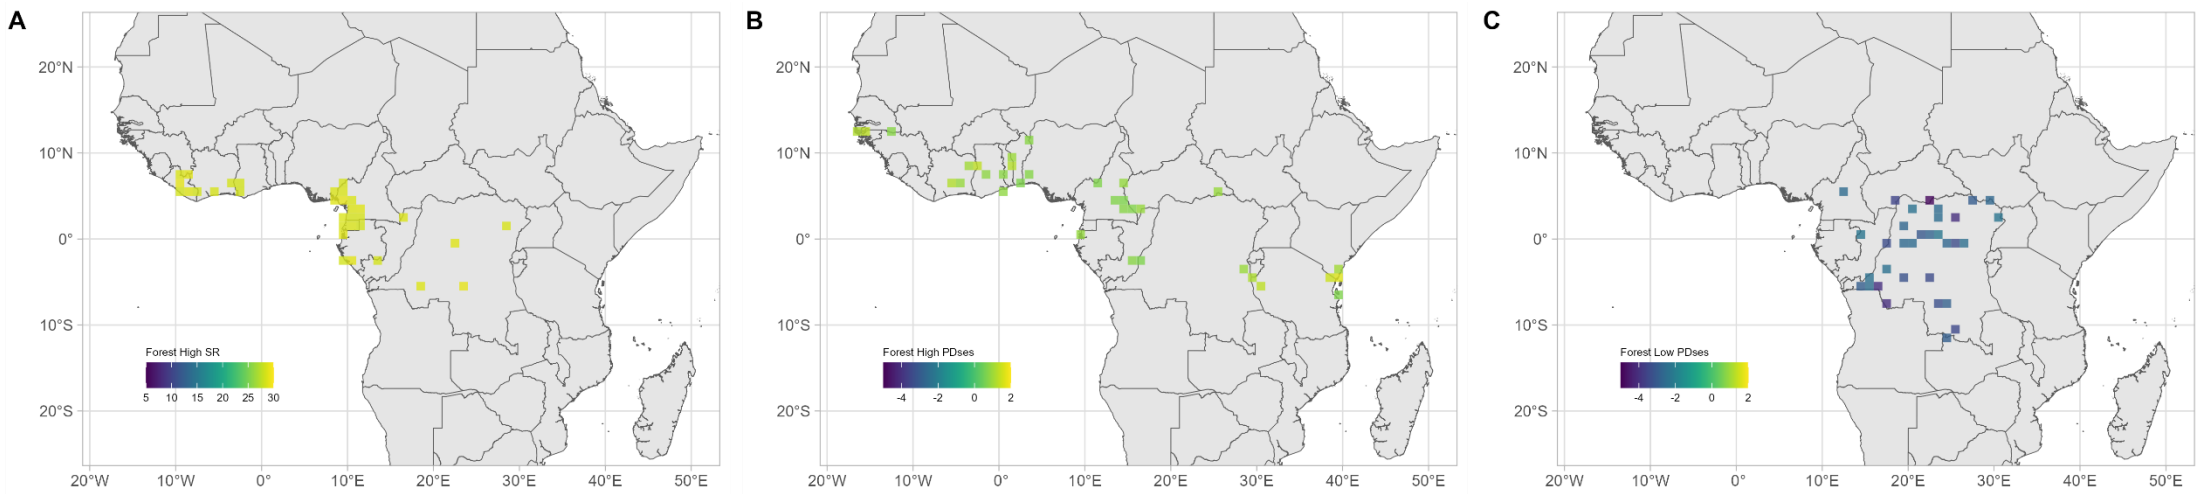

Figure S9: Map of highest 10% SR (A), highest 10%  $PD_{ses}$  (B) and lowest 10%  $PD_{ses}$  (C) for savanna assemblages

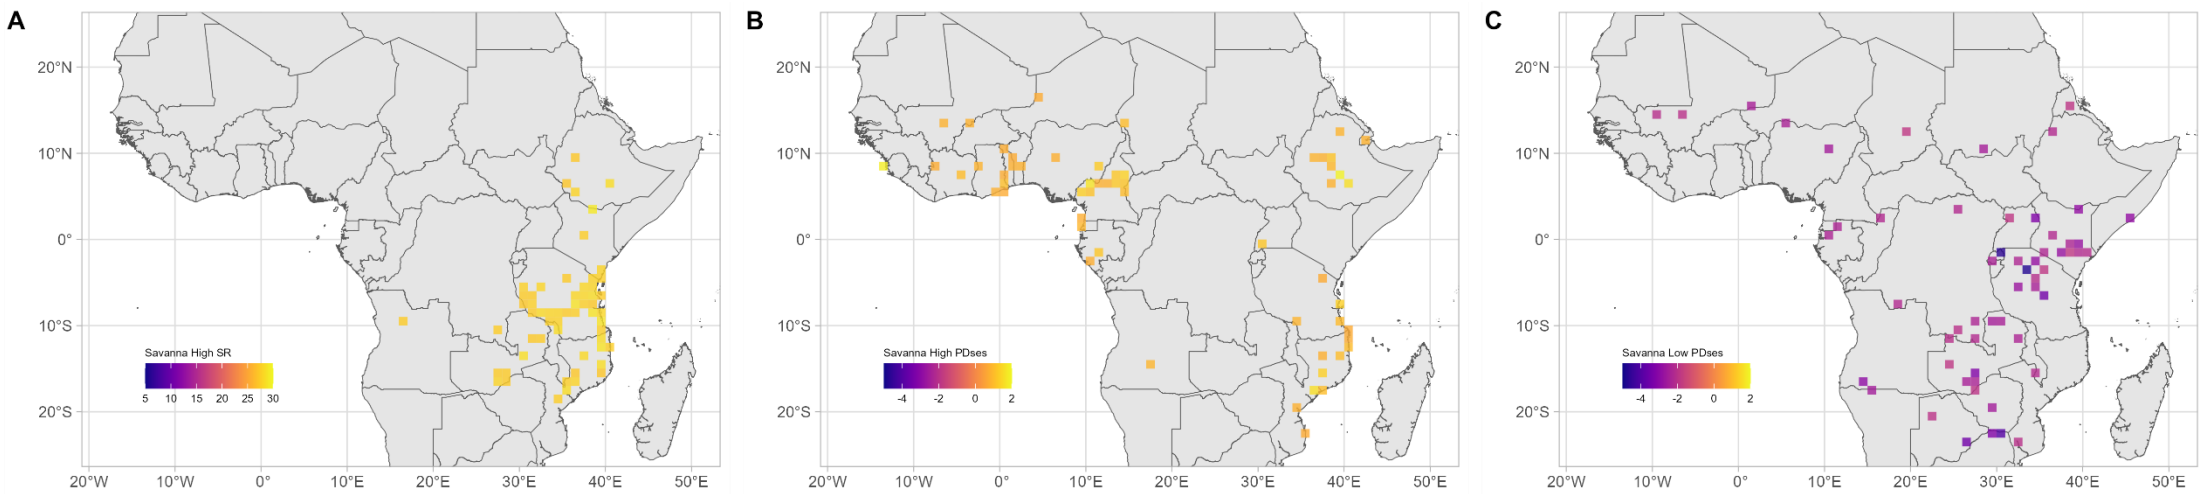

Supplement: s1 [file s1]
